# Supplementary material for: Analysis of CFB, a cytokinin-responsive gene of Arabidopsis thaliana encoding a novel F-box protein regulating sterol biosynthesis
Source: PubMed Central journal article supplement (PMC5853388; doi:10.1093/jxb/erx146), 2017-05-12
Supplement: erx146_suppl_supplementary_figures_s1_s8.pdf [file erx146_suppl_supplementary_figures_s1_s8.pdf]

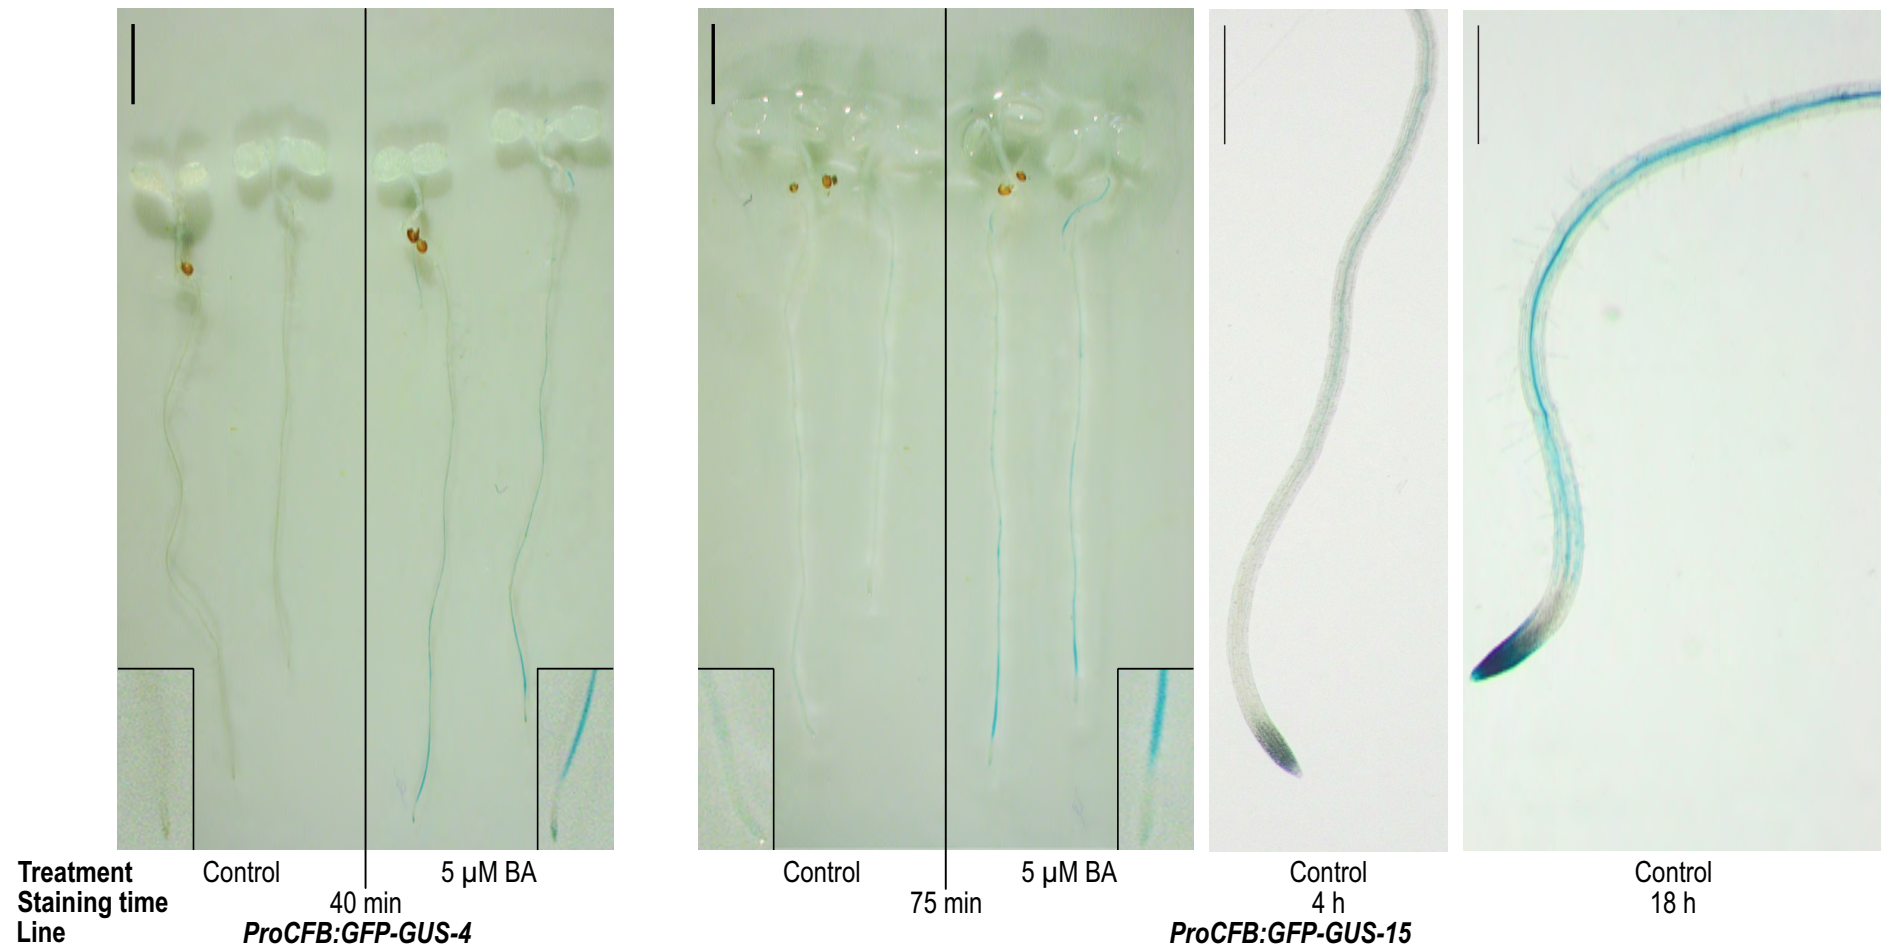

**Figure S1.** Histochemical staining of *CFB* promoter induction by cytokinin in two independent transgenic lines carrying a *ProCFB:GFP-GUS* reporter gene. 6-day-old seedlings were treated with 5 μM of the synthetic cytokinin 6-benzyladenine (BA) or a solvent control for the times indicated. Subsequently, the seedlings were stained according to Jefferson et al. (1987) for the times indicated, inspected and photographed as described in Materials and methods. The insets show magnifications of root tips. Scale bar = 5 mm.

|                            |            |            |            |            |             |             |             |             |            |             |             |             |            |            |            |            |
|----------------------------|------------|------------|------------|------------|-------------|-------------|-------------|-------------|------------|-------------|-------------|-------------|------------|------------|------------|------------|
| CFB [Arabidopsis thaliana] | MLS        | SSSSS-TVEQ | PSR-GGSPGI | NAVSSDVLR  | NILTRLDGSS  | LAALSCTCSN  | LNSFCS-DES  | LWRQCCSATW  |            |             |             |             |            |            |            |            |
| Arabidopsis lyrata         | MLS        | SSSSL-TVEQ | PSR-TGSSGI | NAVSSDVLR  | NILTRLDGAS  | LAALSCTCSN  | LNSFCS-DES  | LWMQQCSATW  |            |             |             |             |            |            |            |            |
| Capsella rubella           | MILSS      | SSSST-MMEQ | PSSYLESSGI | NAVSSDVLR  | NILTRLDGAS  | LAALSCTCSN  | LHSFSS-EES  | LWKQQCSVTW  |            |             |             |             |            |            |            |            |
| Camelina sativa            | M          | LSSSS-MVEQ | PSR-IKISGI | HAVSSDVLR  | NILTRLDGAS  | LAALSCTCSN  | LHSFSS-EDS  | LWKQCCSLTW  |            |             |             |             |            |            |            |            |
| Tarenaya hassleriana       | MLSSS      | YSHPLPTAEH | PPRGGVGTI  | SAVPHDVRS  | HIPCLDGAS   | VAALSSASVE  | LHSLCT-DEH  | IWRDKCIATW  |            |             |             |             |            |            |            |            |
| Arabis alpina              |            | MLPSTAEQ   | PSH-TGSCDI | NAVSSDVILT | HILTRLDGAS  | LAAVSCTCSH  | LHSFSS-EES  | LWKKCTCTATW |            |             |             |             |            |            |            |            |
| AT2G27310                  |            | MA         | TVDVINGDSI | STLHSDIIQT | QILTRLDGPT  | LASTATTSSY  | LQTLCCT-EEK | LWQELSIDTW  |            |             |             |             |            |            |            |            |
| Ziziphus jujuba            | MPSP       | HPTDS---TA | NVDDDGAISI | SAVHPDIIQA | HILTRLDGPT  | SASAGCASSH  | LHALST-QDK  | LWRDICTSTW  |            |             |             |             |            |            |            |            |
| Morus notabilis            | MA         | TSDNM---AV | GGGSGGGTTI | SAIHPDIIQA | HILARLDGPT  | LAAAGCASSE  | LHALSA-DEN  | LWRDICTATMW |            |             |             |             |            |            |            |            |
| Eucalyptus grandis         | MPSP       | STPLAGADAA | PATAHAATVL | TSIHPDVIRT | HILTRLDGPA  | LVAATSASSQ  | LHSLSSSNDK  | LWRDVICIAAW |            |             |             |             |            |            |            |            |
| Vitis vinifera             |            |            | MDSPTTTI   | TSVHPDIIQT | HILTRLDGPT  | LAAAGAASSQ  | LHALAT-VDK  | LWRDICTSTW  |            |             |             |             |            |            |            |            |
| Gossypium hirsutum         |            |            | MNSTTSLPLH | QGG---NTPI | SALHPDIFQS  | HILALLDGSP  | LASLACVSSQ  | LHALST-HDI  | LWFNICSSTW |             |             |             |            |            |            |            |
| Theobroma cacao            |            |            | MKTITSTTVD | QGGYASNETI | STVHPDIIHLS | HILTRLDGSP  | LAALACSSSH  | LHALSS-EEN  | LWQNICSSTW |             |             |             |            |            |            |            |
| Fragaria vesca             | MEAVVDSLPP | KTKDHLQPE  | YYITKPLQPS | LCHHSHPHFK | LQLDLRLTNV  | QLELELEEEEE | QYFDREMASF  | LVEQGGDASI  | SALHSDIITS | HILTRLDGPT  | LASAACSSQ   | LRAFAA-DQT  | LWKDICATTW |            |            |            |
| Malus domestica            |            |            |            | MSFSAVTTL  | AVDQGDPRS   | SVVHPDIIITA | HILTRLDGQT  | LAAASCASSE  | LHSFSA-KEK | LWRDASIAATW |             |             |            |            |            |            |
| Prunus persica             |            |            |            | MGFSA-TSP  | TVDQGDGASI  | SAVHPDIIMA  | HILTRLDGQT  | LASASCASSQ  | LHAFST-EGK | LWRDICSATW  |             |             |            |            |            |            |
| Ricinus communis           |            |            |            | MVPSS      | TLHHHNGTI   | STVHHDILQT  | HILTRLDGPT  | LASLSCASSD  | FHTLSS-QDK | LWQNICSFVW  |             |             |            |            |            |            |
| Jatropha curcas            | MV         | AFPSSTPPP  | TVDPDGDGTI | SAVHHDIHQN | HILNRLDGPT  | LAAVACASSE  | LHGLST-EDK  | LWQKICIDTW  |            |             |             |             |            |            |            |            |
| Manihot esculenta          |            |            |            | MAPP       | NVD--GTVSI  | SSLHLDVLHH  | HILSRLDGSP  | LAALSCTSSSE | LNALSS-YDK | LWQQICTSTW  |             |             |            |            |            |            |
| Populus trichocarpa        | MV         | ALSTPPPQP  | SSTTTQDGTI | STLHPDIIQT | HILTLLDGPT  | LAATACASSE  | LYALST-EDK  | LWRNICSSSW  |            |             |             |             |            |            |            |            |
| Nelumbo nucifera           | MAISAC     | KSSAKTMTTD | EKECGATTTI | SALHPDVVQA | HILTRLDGSP  | LASVCCASSQ  | LHALSN-DES  | LWRDMCHSTW  |            |             |             |             |            |            |            |            |
| Citrus clementina          |            |            |            | MQMAP      | PSFDQNTARI  | SAVHPDIIET  | HILTRLDGPT  | LASACVSSQ   | LHSLAS-DES | LWTNICIDTW  |             |             |            |            |            |            |
| Cucumis melo               |            |            |            | MPSPPPSFSF | HHRSSAEDA   | AALHSDIIQT  | HILTRLDGAA  | LTSTASTSSR  | FRRLLS-EDQ | LWRRVCSSTW  |             |             |            |            |            |            |
| Daucus carota              | MLSLHKD    | SNMVSHISDH | QQERNSSSI  | LDIHSDFSN  | HILTRLDGSS  | LVSTGSASSE  | LNKFKC-DEN  | LWKNICNSTW  |            |             |             |             |            |            |            |            |
| Dorcoceras hygrometricum   |            |            |            | MSSYTSAAA  | AEDHGGGTP   | TAIHSDIVRS  | HILNRLDGPT  | LASTSCASSR  | LFSLCN-DDH | LWREICSSVW  |             |             |            |            |            |            |
| Arachis duranensis         |            |            |            |            | MDIDMI      | TNLHSDIINS  | HILTRLDGPT  | LASAAAASSH  | LRRLCT-QHH | LWTICTSTW   |             |             |            |            |            |            |
| Vigna radiata              |            |            |            |            | MPPM        | DATSSSSSDI  | TTLHPDIIIRS | HILNRLDGPT  | LASASSSTLH | LRRLCS-DHN  | LWRICAATW   |             |            |            |            |            |
| Phaseolus vulgaris         |            |            |            |            | MDTTFSSS    | SSSSSSSSSI  | TTLHPDIIQS  | HILNRLDAPT  | LASASSSTLH | LRRLCT-DQH  | LWRNICAAATW |             |            |            |            |            |
| Glycine max                |            |            |            |            | MTPA        | MDKTSSSSDI  | TTVHPDIFQS  | HILNRLDGPT  | LASAAATSH  | LRGLCT-EHH  | LWRNICAAATW |             |            |            |            |            |
| Cynara cardunculus         |            |            |            |            |             | MAI         | ADIQDIIKT   | HILTRLDGQT  | LSAAACVSLQ | LQSLCS-DDK  | LWSGICSANW  |             |            |            |            |            |
| Sesamum indicum            |            |            |            |            |             | MEFKS       | SSKGVCAFTH  | SPLITTASTE  | PKNENEMPLA | TADQGGANGL  | SALHPDIVRS  | HVLSRLDGPA  | LGSAAACSTT | LRQLSS-DEN | LWSNICHSW  |            |
| Erythranthe guttata        |            |            |            |            |             |             |             |             | MQHGATAT   | TTEHGGAAGF  | SALHPDIIKS  | HVLTTRLDGPA | LGSAAACSAT | LRHISD-DGK | LWSDICHSTW |            |
| Beta vulgaris              |            |            |            |            |             |             |             |             | MSSSPPMST  | TTTTLLTAF   | SLLPDDVIRA  | HILPRLDGCS  | LDAVGCATPE | LSSLSS-DHQ | LWSHICHSTW |            |
| Medicago truncatula        |            |            |            |            |             |             |             |             | MICISG     | ESEAEETTTI  | AAVHSDIIQT  | HILTRLDGPA  | LASAASTCSQ | FNSLCT-NEH | LWANMCHSTW |            |
| Cicer arietinum            |            |            |            |            |             |             |             |             | M          | PKATMSNISG  | NPITAEETTTI | SAFHSDIIQT  | NILTRLDGSA | LASVASTCSR | PHYLCS-TEH | LWENACYSTW |
| Cajanus cajan              |            |            |            |            |             |             |             |             | MVCTTD     | EASCG-ASAI  | SAVHPDVIIQT | HILTRLHGPA  | LACVASTCSE | LNALSA-HEP | LWAEICRATW |            |
| Nicotiana tabacum          |            |            |            |            |             |             |             |             | MSSCSTTTT  | TSDDGGRTAI  | TAVHPDIIQI  | LILTKLDGPT  | LISTSSASSQ | LKNLCS-DDI | LWQKICNSYW |            |
| AT2G36090                  |            |            |            |            |             |             |             |             | MANSSSF    | SPSTTVTDLI  | STVHDDIIES  | HILTRLDGAT  | LASVSCASSH | LHHLAS-NEI | LWSKICRSTW |            |
| <b>Consensus</b>           |            |            |            |            |             |             |             |             |            |             |             |             |            |            |            |            |
| <b>Conserved regions</b>   |            |            |            |            |             |             |             |             |            |             |             |             |            |            |            |            |

**Figure S2.** Multiple sequence alignment of Arabidopsis CFB, AT2G27310, and AT2G36090 and orthologs of other dicotyledoneous plant species. The alignment was carried out using MultAlin (<http://multalin.toulouse.inra.fr/multalin/>) with the standard settings (Corpet, 1988). The colored lines correspond to the conserved regions shown in Fig. 2A. Red and blue amino acid symbols denote highly (≥ 90 %), and less (≥ 50 % and < 90%) conserved residues, respectively. Symbols for amino acids other than letters in the consensus sequence: ! = I or V; \$ = L or M; % = F or Y; # = N, D, Q, E, B, or Z.

|                            |            |             |             |            |            |             |            |            |             |            |            |             |            |       |
|----------------------------|------------|-------------|-------------|------------|------------|-------------|------------|------------|-------------|------------|------------|-------------|------------|-------|
| CFB [Arabidopsis thaliana] | PST-SDTRVQ | SIISTFPDG-  | HRTFFSDSFP  | FLEH-----  | ---DVGIN-L | PPSVDTSELI  | SAVD-----  | ---IFYKDDV | IFSRVHVTTET | V---SGWFLC | SPMRVDLVEP | -KELIPTRVL  | VTDQCKD-DT |       |
| Arabidopsis lyrata         | PST-LDTRVQ | SIISTFPAG-  | HRQFFSDSFP  | FLEH-----  | ---DGVIN-L | PPSVDMTELI  | SAVDMTELIS | AVDIFYKDKV | IFSRVHVTTET | V---SGWFLC | SPMRVDLVEP | -KELISTKVS  | VVNQWED-DT |       |
| Capsella rubella           | PST-LDARVQ | SIISTFPAG-  | HRTFFSDSFP  | FLGQ-----  | ---DGVIN-L | PPSVDTELEI  | SAVD-----  | ---IFYKDEV | IFSKVHVTTET | V---SGWFLC | SPMRVDLVEP | -KEMVSTKVS  | VVEQWED-DT |       |
| Camelina sativa            | PST-LDARVQ | SIATFPVVG-  | HRTFFSDSFP  | FLER-----  | ---NGVMNML | PSSVDTELEI  | SAVD-----  | ---IFYKDVQ | IFSKVHVTTET | V---SGWFLC | SPMRIDLVEP | -KELISTRVS  | LVNQWED-DT |       |
| Tarenaya hassleriana       | RSF-LDPRVQ | RVISTLPSG-  | HRSFFSDSYT  | HLGL-----  | ---RRGLVDL | PPSVATKELI  | SAVD-----  | ---IYYKGEV | IFSKVQETET  | V---SGWFLC | SPFRVDLLDP | -KESVSTRIP  | YNDQWDE-ET |       |
| Arabidopsis alpina         | PST-SDTRVQ | SIISTFPDG-  | HRSFFSDSFP  | FLG-----   | ---GEIDLT  | PPSVDTELEI  | SAVD-----  | ---IHYKDEV | IFSKVQATET  | I---SGWFLC | SPMRVDLVEP | -KELITTRVS  | LIDQWEN-DT |       |
| AT2G27310                  | PSI-NDPRVQ | QAISFPDG-   | YRSFFADSYF  | FTEH-----  | -----TWQS  | EKHDPPTGLI  | SAVD-----  | ---LYYRGEI | IYSKVQEMET  | EKGKSGWFLS | SPFRVDILDP | -KESVQTRIR  | YPPGDYE--A |       |
| Ziziphus jujuba            | PSI-NDPRVQ | RLISSFPDG-  | HRSFFSDSFP  | LLDP-----S | SFCRFGHG-- | RPLSSTSELI  | SAVD-----  | ---IFYKDSL | IFSKVQEIET  | L---SGWFLC | SPFRVDLLDP | -KESAPTIQ   | HVAGEDD-GA |       |
| Morus notabilis            | PSV-ANPALR | RLISTFPAG-  | HRSFFSDSFP  | VLDL-----V | PPQTFNPD-- | PPFLS-SGLI  | SAVD-----  | ---IFYKDKL | IFSKVKETET  | L---TEWFHC | SPFLVDLLDP | -KDSVQTIQ   | RAA-VDD-GA |       |
| Eucalyptus grandis         | PSV-RDPRVA | EAIATFPDG-  | HRSFFSDSFP  | VLHH-----H | KLRRRRSP-- | PPPMA-ECLI  | SAVD-----  | ---VHYEGEA | IFSKVHETET  | V---SGWFEC | SPFRVDLLDP | -KESVPTRIQ  | KPGGTPD-EA |       |
| Vitis vinifera             | PSV-NDPTLQ | ALVSAFPDG-  | HRSFFSDSFP  | LLDH-----S | ACSSDTSS-- | RLVIPASELI  | SAVD-----  | ---IFYKDEL | VFSKVHETET  | E---TGWILC | SPFRVDLLDP | -KDTVPTPVQ  | YSV-DGD-YK |       |
| Gossypium hirsutum         | PSL-NHPRLQ | QIISTFPDG-  | HRSFFSDSFP  | FPDL-----  | -QPLKLDV-- | NSCTLPTLEI  | FAVD-----  | ---VYYQNGI | IYSKVEELDT  | S---SSWFLC | SPFRVDLLDP | -KDSASTPVR  | YLGGSQD-EA |       |
| Theobroma cacao            | PSV-NHPRLQ | KIISAFPDG-  | HRSFFSDAEP  | FLDL-----  | -QPLKLN--  | NSLTLPTLEI  | SAVD-----  | ---ISYRNKI | IYTKVEEMET  | S---SSWFLC | SPFRVDLLDP | -KDSAPTIQ   | YFGGSKNVDT |       |
| Fragaria vesca             | PSV-SDKRVH | DIISTFPDG-  | HRSFFSDSFP  | LLDH-----S | ACSSDTSS-- | RLVIPASELI  | SAVD-----  | ---IFYKDEL | VFSKVHETET  | E---TGWILC | SPFRVDLLDP | -KDTVPTPIR  | HIGETN---E |       |
| Malus domestica            | PSI-TDPRVN | DLISTFPDG-  | HRFFSDSFP   | LLDH-----S | PSQFNFS--- | PSSP-TAELI  | SAVD-----  | ---IFYKQDL | IFSKVQESET  | E---SGWFLC | SPFRVDLLDP | -KETVPTPIQ  | HVGEDQ---K |       |
| Prunus persica             | PSV-ADPRVD | DLISTFPAG-  | HRSFFSDSFP  | LLDN-----F | PSRFDLRS-- | PSSPPTTELEI | SAVD-----  | ---IFYKQDL | IFSKVQESET  | E---SGWFLC | SPFRVDLLDP | -KETVPTPIR  | HVGEDQ---A |       |
| Ricinus communis           | PST-NDPLLS | SVISSFPDG-  | HRSFFSDSFP  | LLRH-----H | RPTCRTLP-- | TPFPSTTELEI | SAVD-----  | ---IYYRNVP | IFSKVEKTET  | V---SRWFCL | SPFRVDLLDP | -KEFVPTWIQ  | -KAGEKD--S |       |
| Jatropha curcas            | PSI-NDPLTS | SIISTFPDG-  | HRSFFSDSFP  | LLHH-----H | RHSSHILE-- | RPSPETTELEI | SAVD-----  | ---IFYKGEF | IFSKVEETET  | E---SGWFMS | SPFRVDLLDP | -NKDFVPSGIP | -QASEND--S |       |
| Manihot esculenta          | PSV-NHPLVT | HAVSTFDSA-  | HRSFFSDSFP  | LLLH-----  | RHSCHDL--  | RFPFPATRELI | SAVD-----  | ---IYYQNGV | IFSTVEATET  | V---TGWFSL | SPFRVDLVGP | -EEFIPTRIQ  | -QIGEN--S  |       |
| Populus trichocarpa        | PSI-NDPTVS | SIISTFPDG-  | HRSFFSDSFP  | LLHH-----H | HHSSSFLT-- | T---STEYLV  | SAVD-----  | ---IYYKQVA | IFSKVEKNET  | L---TDWFKC | SPFRVDMLDP | -KEFVQTLIQ  | YQGEK--S   |       |
| Nelumbo nucifera           | PST-DTPRIR | DIVSSFPDG-  | ARSFFSDSFP  | LLVSP---HD | QAPPSNLN-- | PPVS-PPEII  | SAVD-----  | ---IHYRGNL | LFSKAHETET  | L---SGWFRC | SPFRVDLLDP | -KEVVPTPII  | ISDG-----  |       |
| Citrus clemantina          | PST-NTPLRL | HVISSFPDG-  | PRSFSDSFP   | N--PD---QT | PASTSSSS-- | PSLNRPSSEII | SAVD-----  | ---VYYKKNL | IFSRVVEETET | A---SGWFNC | SPFRVDLLDP | -KDSVPTPIR  | HPDNED---- |       |
| Cucumis melo               | PSI-THPKLQ | QLISTFPDG-  | HRSFFSDVFP  | VLDL-----  | CSLRCDL--  | YRYSSTAELI  | SAVD-----  | ---IHYKKNL | LFSKVHSIET  | E---TNWFCL | SPFRVDLLDP | -KDSIPSPIR  | RSEKYED--- |       |
| Daucus carota              | PST-DDRRLQ | DIIAAFPAG-  | YRSFFSDCYP  | SLDHSAPKV  | QLVDREIEGR | QSLSKISELI  | SAVD-----  | ---IRYDNNL | IYSKVQSTET  | S---TDWFSL | SPFRVDLLDP | -KETIPTPVP  | VLEGNK--L  |       |
| Dorcoceras hygrometricum   | PST-TDPRVR | AVISGFSSG-  | YRSLYSDAEP  | SVAH-----Q | RSAGRRTKKR | SLPSGTELEI  | SAVD-----  | ---IYCDLKL | IYSKVMVTTET | H---SGWFMC | SPFRVDLLDP | -KETVPTPLI  | FDGEDG---  |       |
| Arachis duranensis         | PSL-THPLAA | HLISTLFPDG- | HRSFFSDSFP  | SLHP-----  | -SALHN-NQK | PPSPSPPELEI | SAVD-----  | ---IYYNGKP | VFSRVHRTET  | Q---KGWFLC | SPLWIDLDP  | -NETVPTPLK  | FAKSEDD-DD |       |
| Vigna radiata              | PSL-NQPHAS | ALIDTFPAA-  | HRSVFSDSFP  | SIQY-----  | -SPP---PNP | IPRRLSPEFV  | SAVD-----  | ---LYYKGRP | VFSRVITTTET | H---KGWFLS | SPLWVDLLDP | -NEVVPTPLI  | FAKDEE--SS |       |
| Phaseolus vulgaris         | PSL-NQPRAA | DLIATFPAA-  | HRSVFSDSFP  | SIHH-----  | -SPS---PHP | TPTRPPPELV  | SAVD-----  | ---LYYKGRP | VFSRVITTTET | Q---KGWFLS | SPLWVDLLDP | -NEVVPTPLI  | FAKCEE--SS |       |
| Glycine max                | PSL-NDPLAA | ATIATFPAT-  | HRSIFSDSFP  | SLHH-----  | -SPNPIPTQ  | PPTPPPELEI  | SAVD-----  | ---IYYKGRP | VFSRVITTTET | H---KGWFLC | SPLWVDLLDP | -TEVVPTPLK  | FAQTNDE-IE |       |
| Cynara cardunculus         | PST-DDPLVR | QAISNFPDG-  | HRSFFSDSFP  | FPSH-----  | ---RLTTT   | SPSAPTSQII  | SAVD-----  | ---LRYHDEL | VFSKVESTNI  | TH--SDWFRS | SPFRIDLDP  | -KELVPSAVK  | FSGDDH---V |       |
| Sesamum indicum            | PST-TSPQLS | HLISTFPDG-  | PRAFSSHAEP  | VLA-----   | -ADRNLTRSS | S--NPPSELI  | SAVD-----  | ---IRYKDNL | IFTKVQETET  | V---SGWFRC | SPFRIDLDP  | -KDVVPTP--  | -----      |       |
| Erythranthe guttata        | PSTASSPRLS | HLISNFPDG-  | ARAFSSHAEP  | VVA-----   | -ADGGSVRPP | S--NPPAELI  | SAVD-----  | ---IFYKGNL | IFSKVQETET  | V---TGWFRC | SPFRIDLDP  | -KDVVPTRVK  | HPEGDG---  |       |
| Beta vulgaris              | PSTAT-PRIR | HLISSFPDG-  | ARSFFSMEFP  | LLS-----   | -PNDPPLPS  | SCCSLPDQLI  | SAVD-----  | ---IFYKGNL | IFSKVQETET  | V---TGWFRC | SPFRIDLDP  | -KESVPTPIK  | RPSHDD---- |       |
| Medicago truncatula        | PST-NTERVQ | QVISNFPDG-  | FRSFFADSF   | SHHQ-----  | -RDMTLT--- | NHDETSLI    | SAVD-----  | ---IFHREGL | VFSKVVEETET | V---TGWFRC | SPFRVDLLDP | -KDVIKYVTV  | GDENNV---- |       |
| Cicer arietinum            | PST-NTPCVR | HAISTFPDG-  | SRSFFADCF   | SHYL-----  | -ATTTIETAS | MNLDRTPRLI  | SAVD-----  | ---IFHRKRL | VFSKVVEETET | V---TGWFRC | SPFRVDMLDP | -KDVIKCPVQ  | D-----     |       |
| Cajanus cajan              | PST-SAPVRV | HVISTFPDG-  | SRSFFVSDSLA | SFSA-----  | -RGWREA--- | SADRAPLEI   | SAVD-----  | ---VFFEGRA | VLSRVVEETET | E---SGWFRC | SPFRVDVLP  | -KEAATAVE   | YPRSEE---- |       |
| Nicotiana tabacum          | PSS-SNPLVQ | NAISTFPDG-  | HRSFFSDSFP  | ALLH-----  | HNNPNICRTE | YRNFLTSELI  | SAVD-----  | ---IHFENL  | LYSKVQETET  | K---SGWFMT | SPFRVDLGH  | -KETVPTPIK  | FDGDDG---I |       |
| AT2G36090                  | PSC-----   | -----SGG    | SRSFFSDAYS  | MVE-----   | ---TAGTVS  | DLDRPPELEI  | SAVD-----  | ---LHYRGNL | IFSRVVKETET | T---TAWFKS | SPLRIDLVDT | -KDTVATPIK  | RRQRTED--- |       |
| Consensus                  | PS .dprv.  | ...!stFP.g  | hRsfFSDs%p  | .l...      | ..         | .....eli    | SAVD       | i.%....1   | i%SkV..tET  | .          | sgWfLc     | SPfr!D\$1#p | k#.vptp..  | ..... |
| Conserved regions          | ■          | ■           | ■           | ■          | ■          | ■           | ■          | ■          | ■           | ■          | ■          | ■           | ■          | ■     |

Figure S2. (continued)

|                            |      |         |            |             |            |             |            |             |            |            |             |            |             |             |
|----------------------------|------|---------|------------|-------------|------------|-------------|------------|-------------|------------|------------|-------------|------------|-------------|-------------|
| CFB [Arabidopsis thaliana] | WKS  | DLEENLS | LSWILIDPTC | KRA-ADVSTR  | KPVSVHRHWL | TGEVHVKFSS  | IFVVGNNKR- | S-EQVEFTVT  | VVLAVFNRR  | EETAVMQIRE | VSLVAEDKDG  | RNLGGKVSLE | ILVAAMGMKR  | R-----FRA   |
| Arabidopsis lyrata         | WKS  | DLEKDL  | LSWILIDQTG | KRA-ADVSTR  | KPVSVQRHHL | TGEVHVKFST  | IFVVGNNKR- | S-EQVEFTVT  | VVLAAFNRR  | EETAVMQIRE | VSLVAEDKDG  | RNLGGKVSLE | ILVAAMGMKR  | R-----FRA   |
| Capsella rubella           | WKS  | LEENLS  | LSWILIDPTR | KRA-ADVSTR  | RPVSVRHHWL | TGEIHVRFNS  | IFLVS      | EEVEFTVT    | VVMAAFSRK  | EEKAEVQIRE | VSLVAEDAEG  | RNLGGKVSLE | ILASAMGMDR  | RR-----FRV  |
| Camelina sativa            | WKS  | DLEENLS | LSWILIDPIR | KRA-ADISTR  | RPVSVRHHWL | TGELHVKFST  | VFVGGDKKKS | Q-EEVEFTVT  | VVLAAFNRR  | EEKAEVQIRE | VSLVAEDMEG  | RNLGGKVSLE | ILSSAMGMKR  | RR-----FRA  |
| Tarenaya hassleriana       | WVR  | NAEENLS | LSWILIDPTR | KRA-ANVSSR  | RPVSVRHHWL | TGEVHVRFST  | VLAGNRKRS  | S-SSSEL---  | VEFATEMVMA | PEASAVEVRE | VSLVAEDMEG  | RNLGGEGSLV | ILTAAMGGGR  | R-----RG    |
| Arabis alpina              | WKD  | DLEENLS | LSWILIDPTC | KRA-ADVSTR  | KPVSVQRHHL | TGEVHVRFST  | ILVVG----  | E-EQVEFTVT  | VVLAAFNRR  | EDTATMQIRE | RSVGGGG     |            |             |             |
| AT2G27310                  | WVK  | DMEESMK | LNWILIDPIK | KRA-ANISSR  | KAVSARRNWL | TGDLEIRFST  | VVTAEEAEVA | A--VVSCGSA  | EAWKEVDEEV | GGEI--HVRD | VRLQVEDIEG  | KCMKGRDSLV | ILQGLLDGKR  | SC----KDDE  |
| Ziziphus jujuba            | WLK  | HLEENLT | LSWIVIDPTR | KRA-ANLSSR  | KAVSVQRHHL | TGDVQLRYTT  | IMARGPGRD- | D-DHVECAMV  | VTC--GGKE- | GGKL--HVRE | VSLQVEDMEG  | KHLSGRDSLG | ILESIAEGGK  | RK----KLAG  |
| Morus notabilis            | WLK  | HLEENLK | LSWILIDPTR | KRA-ANLSSR  | GAVSVRHHWL | TGEIQLRYAT  | IMDGPASTPA | T-EHVQCGMM  | VTC--GGEE- | GDEV--RVRE | VGLHVEDTEG  | RHLSGQESLV | VFRNAIEGGK  | RK----KENG  |
| Eucalyptus grandis         | WLR  | HLEESLS | LSWIVIDPAR | KRA-ANFSTR  | RPVSVQRHHL | TGDVQVQYVT  | VVAGGPPGSA | A-EHVQCTAT  | VTC--GGKE- | GGGL--HVRE | VSLQVEDMEG  | KSLSGKDSLA | ILGEAMESGE  | RK----KAKR  |
| Vitis vinifera             | WLS  | HLEDLT  | LSWILIDPTR | KRA-ANLSSR  | KPVSVRHHWL | TGEVQVRYAT  | VV-GGDRTVG | S-EVVQCGIV  | VTC--AGKE- | GGEM--QVRE | VNLQVEDMEG  | RHLNGKESLV | ILQGAIEGGK  | RK----KAKG  |
| Gossypium hirsutum         | WLQ  | HLEENLS | LSWIVINPTR | KKA-VNVSSR  | RAVSVQRHHL | TGDVQVRFGT  | VTAGDEGRGS | SRELVECGVV  | VTC--CGKE- | GGEM--HVRE | VCMVMEDMEG  | KGLNGKDSLV | ILEGVIEQGR  | RK----GGEG  |
| Theobroma cacao            | WLK  | HLEENLT | LSWIVIDPSR | KKA-VNMSSR  | RAVSVRHHWL | TGDVQVRFGM  | VMGGGRRGS  | SRELVECGVV  | VTC--VGKE- | GGEM--HVRE | VSMVMEDMEG  | KGLNGKDSLV | ILEGMENGR   | RK----KNGG  |
| Fragaria vesca             | SLK  | HLEENLT | LSWIVIDPAQ | KRA-ANLSSR  | KPVSVRHHWL | TGEVQLRFAM  | IMPGNRRG-- | --EFVQCGMV  | LTC--KGS-  | GGKL--HVRE | VSMQMEAMEG  | RHLNGKESLV | ILQGAIEGGK  | RK----R-ES  |
| Malus domestica            | SLK  | HLEDNLS | LSWIVIDPTR | KRA-ANLSSR  | TAVTVQRHHL | TGEIQLRFAT  | ILAGEKKG-- | --EYVQCGMV  | VTCRSGSE-  | GREL--HVRE | VSMQMEAMEG  | NHLNGRESLV | ILQRAIEGGK  | RR----K-EV  |
| Prunus persica             | SLK  | QLEENLS | LSWIVIDPTR | KRA-ANFSSR  | RAVTVQRHHL | TGEIQLRFAT  | ILAGEKKG-- | --EFVQCGMV  | VTC--NWSE- | GGEL--HVRE | VSMQVEGMEG  | NHLNGKESLV | ILERAIEGGK  | RR----K-EV  |
| Ricinus communis           | WLK  | QLEEDVT | LSWILIDPEQ | KRA-VNISSK  | RPVSVQRHHL | TGEVQAKFAT  | IFAGDRGKGS | ETEYVECEVV  | VTC--GGKE- | GGEV--RVRD | VSMGMEDMEG  | KALTGEDSLV | ILKEATERGE  | RR----RGE-  |
| Jatropha curcas            | RLK  | QVEQNLT | LSWILIDPKQ | KRA-VNISSH  | RAVSVQRHHL | TGEVQAKFAT  | ILAGDEEKGS | EREYVQFEVV  | VTC--GGKE- | GGEI--HVRD | VSMVMEDMEG  | KTLTGKESLV | ILQEAEMERGE | RR----KGS-  |
| Manihot esculenta          | WLR  | QIQENIT | LSWILIDPQK | KRA-MNMSSQ  | RAVSVRHHWL | TGEVQVKFAS  | ILAGDGGMGS | ERESVQCEIM  | VTC--GGEE- | GGEV--HVRD | VSMVMEDMEG  | KVLSGKESLV | IVDGAMERGE  | RR----KEKS  |
| Populus trichocarpa        | FVK  | QLEENMT | LSWILIDPKR | RRA-MNLSSG  | RPVSVQRHHL | TGEVVVKFAT  | IMAGD---GG | EKEFVECGVM  | VCC--GKKE- | GGEM--EVRE | ISMGMEDMEG  | RNLTGKESLV | VIQEAEMERGE | RR----KGC   |
| Nelumbo nucifera           | TCQ  | DLAENLK | LSWIVIDATG | RRA-ANLSSW  | RPVSVQRHHL | SREIHARFAT  | ILAG-DR-GS | T-EFVQCGIV  | VTC--GGCE- | GGEM--QMRE | VSLQVEDMDG  | TNLSGKDSLV | IMQRAMORGE  | RK----KGR   |
| Citrus clementina          | TCR  | EAEDLT  | LSWILIDPIG | RRA-MNLSSY  | KPVTVQRHHL | SGEAHRFSL   | VLSGGDK-GS | SSEFVQCGIV  | VTC--GGSQ- | GGEM--HVRE | VNLQVEDMDG  | TNLSGKDSLV | ILQRLGEGKR  | RN----VRGR  |
| Cucumis melo               | WLG  | HLEENLT | VSWIIDPIN  | NRA-ANISSR  | QPVKVRHHWL | SGEIQVQYTT  | VMGGDRRAGS | AVEMVECAVV  | VSCGEKEE-  | GMEM--SVTE | VSMQMLDMEG  | KHLNGKESLG | ILREAMEKKG  | RI----RGRK  |
| Daucus carota              | FRS  | QLDQNL  | LSWILIDPVS | QRA-ANLSTL  | TPVSVRHHWL | DEDIAHAYVT  | SLPG-LFAGE | SSEVQCSIL   | VVC---GGT- | GGDL--QIKE | VSLLVQDMGD  | KSLNGRESVA | ILHEAMEGQR  | KR----KGRK  |
| Dorcoceras hygrometricum   | CMQ  | IASDRLR | VSWILIDPAK | SRA-VSVASL  | KAVEARRHHL | TGEVLLRFAT  | VASGGDD--- | --ELFQCAVM  | ITF--GGRE- | GKQM--HARE | VYLQVEDVEG  | KIVRGMSL   | ILREAMEGPR  | CI----SSQR  |
| Arachis duranensis         | WLR  | HVQENLE | LSWILIDPSL | KRA-ANLSSR  | RAVSARRHHL | TGEAEVVYAV  | GVVEEG---  | ----AQCAVK  | VTC---CGKS | GGEM--QVRE | VSLTMEIDL   | RHVMGRDSMV | ILQRAMESSK  | RK----KVDV  |
| Vigna radiata              | WLA  | HLEENLG | LSWIVIDPTR | KRA-ANLSSR  | RPVAARRHHL | TGDLEVI FAV | TMET-----  | ----VQWVIR  | VTC---CGKA | GGAM--HVRE | ASLTMEDETEG | RHVTGRDSFV | ILQDAVENGE  | RR----KDPD  |
| Phaseolus vulgaris         | RLA  | HLEQNLE | LSWIVIDPTG | KRA-ANLSSR  | RPVAARRHHL | TGDLEVS FAV | TMES-----  | ----VQCVIR  | VTC---FGKA | GGAM--HVRE | VGLMMEDETEG | RHVIGRDSFV | ILQDAMANGE  | RR----KDPD  |
| Glycine max                | LLN  | HLENLA  | LSWIIDPTR  | KRA-ANLSSR  | RPVSARRHHL | TAELEVL YAV | PMET-----  | ----VQCVVK  | VTC---CGKV | GGAM--HVRE | VSLTMEDETEG | RHVMGRDSMV | ILQDAMANGE  | RE----KLDA  |
| Cynara cardunculus         | MQS  | NLEKHT  | LSWILIDPIQ | HRA-VNLSSI  | KPVSVHRNWL | TDDIELTFAV  | VTAT-----  | ----YVKCNIE | MTC--GVKEG | SSEV--YVSG | VSLTVQDVGD  | KCLNGKDSLV | ILQGLAVAQR  | RS-----RKHS |
| Sesamum indicum            | --SD | MVDDMM  | LSWILIDPIG | RR-AVNLSH   | KPVSVRHHWL | TGEVQVRYAS  | ILAVDQR--- | ---QVQCGIV  | IRC--GGSEC | GDEM--QVRE | VSLIEIDMDG  | THLNGKESLV | FLQGALEGKK  | GT-----GK   |
| Erythranthe guttata        | ACA  | EMIDDMV | LSWILIDPTG | RRRANVLSH   | KPVAVQRHHL | SGEVQVRYAS  | ILAADQG--- | ---HVQCGIV  | VTC--AASE- | GGEM--QVRE | VSVEMEDMDG  | NHLTGKDSLV | FLHGALEGKK  | GT-----GK   |
| Beta vulgaris              | TKC  | LDYADLE | LSWIVMDPTG | GR-AVNVSS   | RPVSVRHHWL | SSEVHVRYAA  | VV---EG--- | ---HVMCSVE  | VTC--VGGGP | GGGLVHLHTE | ACLKMEVDG   | AHLNGKDSLV | ILQRLGEGKR  | GSCLCRKGME  |
| Medicago truncatula        | TCH  | DLEELR  | LSWILIDPAS | HRA-VNVSSR  | KAVAVQRHHL | SGEVKARFTT  | VVYG-ET-AT | ALEVALCSVV  | VML-----   | -AESMEVRE  | VSLQVEDMDG  | KHVNGRDSLV | ILQKALEGGR  | KW----KGVGE |
| Cicer arietinum            | TCR  | NLEELR  | LSWILIDPVS | RRA-VNVSSG  | KAVTVQRHHL | SGEVNLQFAT  | VVYG-EI-AT | ALEVALCSVV  | VTL-----   | -VESMEVRE  | VSLQVEDMDG  | KHVNGRDSLV | ILKRALEGGR  | NW---KGDE   |
| Cajanus cajan              | ECA  | EIGEKLR | LSWIVDPEG  | RRA-VEVSGG  | RAVSVRHHWL | SGEVRVRLAT  | VVGGGER-GS | ATEAALCSVT  | VTF-----   | -GGE-MQVRE | ACLEMEDLDG  | MQLNGKESLG | ILQRALEGKR  | GKLLSEGHG   |
| Nicotiana tabacum          | CKS  | RLKENMK | LSWILIDPKK | NRA-VNMSL   | KPVSVRHHWL | TGELKVRYS   | VMASGADAG  | GGGLVQCGIV  | VTC---EGKE | GGEL--HVRE | VSMQMEAMEG  | KVLSGKDSLV | ILQEAEMERGE | KKRKEGKKE   |
| AT2G36090                  | TCR  | DLKDLT  | LSWIVIDPIG | KRA-ANISSH  | RPVSVQRNWI | SGEVEAQFAT  | VVGA-----  | ----VECVIT  | VVT-----   | CGEEMHVRE  | VSLKVEKMEG  | THLNGRDSLV | ILRSVMEGKR  | VN-----GS   |
| Consensus                  | .... | leen\$. | LSWILIDP.. | kRA.a.#.Ssr | rpVsv.RhWL | tg#v.vr%at  | ...g.....  | ...e.v.c... | vtc.....   | gge....!r# | vs\$.#dm#G  | ..l.Gkdslv | !l..a.eggr  | r. ....     |
| Conserved regions          |      |         |            |             |            |             |            |             |            |            |             |            |             |             |

Figure S2. (continued)

391 461

CFB [Arabidopsis thaliana] GGEEE**GKEKY** IEYMERKTAK AEMKWRRGKE TAMETAACWI A---VLLLG F LLCFYLFMHK NLVAIMKKLI K

Arabidopsis lyrata GGEGGG**GKEKY** LEFMERKSEK AEMKWRRGKE TAMETAACWI A---VLLLG F LLCFYLFH K NMVAIMKKLI K

Capsella rubella GREEEG**GKEKY** REFKERKTAK SEMKWRRPEKE AAMETAACWI A---VFLLG F LLCFYLFH K NMMAIMNKL K

Camelina sativa GGEE**DGKEKY** REFMERKTGK AV---RREKE TAIETAACWI A---VLLLG F LLCFYLFH K NMIAIMNKL K

Tarenaya hassleriana GGE---ERY RELEQRKREA REERGRSS KAVDTAACV AGGAAVVSF WLC**LYLCIRQ** KLVVIVNKLK

Arabis alpina

AT2G27310 ERR--AKERY EEYVRMKIQW RENKERREKA QDTICMIFGF S---MFVLLW SFILLR

Ziziphus jujuba KGRE**FQQR** EEYLEMQQR KEKKARRELA LDMACIVCGI S---MVFVW TFLVFR

Morus notabilis VGE--GKERF EEFLVRRREM REKKQRRELA LDLACILTVG S---IFVAFW SFVLF

Eucalyptus grandis ASE--GKERF EEYEARKRER REKQRAERA LDLLCIVVGV T---AFVGFW SFILFR

Vitis vinifera EE---GKARY ERYLEMMGER RERLRREKT LDMVCIALGV T---IFLSFW SYFLFT

Gossypium hirsutum NE---GKVKF EE**FQRR** KEENQRKERV LDLVCIITVGV V---GFVSFW SAILFK

Theobroma cacao NE---GKERY EE**FGR** KERRQRKERA LDLVCSISIGV A---GFVTFW SAMLFR

Fragaria vesca EEGEG**GKARF** GEFLEMKRER KERTQRRELA LDMVCIAAGV T---LFMAFW SFVLF

Malus domestica K---GKAKY EEYLEMKRER REKERREKA LDMICIAAGV T---IFMAFW SFVLF

Prunus persica K---GKGRF EEYLEMKRER REKERREKT LDMICIATG

Ricinus communis --D---GKERY KEFLKRREW KERKERRESV LDWVCITAGV T---SFLAFW SFILFR

Jatropha curcas GKE--GKERF KEFLERKRE KERQRREKI LDWVCIASGI S---SFMAFW SYILFQ

Manihot esculenta GEE--GKERY NEFVGRRRDR REKRRREKI WDLVCIASGF S---SLMAFC SFLLLS

Populus trichocarpa GTE--GKGRY EE**FVRR** KARQKMEKV LDMVCIVTGI T---IFVSSW SFILFR

Nelumbo nucifera KGE--GKERY EELLRRKAER KERKLRRRGR LDSMCMFVSV L---FFASVW MLCFLR

Citrus clementina EDE--GKRKY EDYVEKKRER REKLRTEGA LDMLCVAFGV F---TFSSG LYLLWR

Cucumis melo GD---GKLRY EEYEEMKRER KARKERIENG LDMLCRSSG

Daucus carota EEE---RERY QELMEMRREM GERQRRERM MDMVCMLTGV S---IFMAFC GFLWLR

Doroceras hygrometricum ME---KEKY EMLVKMKIEC LERKQRRELA LDMAFVAIAV S---IFLAIL IYFLNR

Arachis duranensis VE---AKERY EKFCDTKIER REMRIKREKT MDTVAMFVAF T---VFVTLF CFLRFYVCV

Vigna radiata EE---AKARF DKFCRLKREI REKLRRRDSA MDTVAMLVSF T---IFVSLF WFMVFGF

Phaseolus vulgaris EE---ARARF EKFCRLKDI REKVRRRDNA MDMVAMLVSF T---VFVSLF WFMVFGF

Glycine max EK---AKERF EKFSIVKREI REKMRDRRA MDMVAMLI AF A---VFALLF CFMAFGV

Cynara cardunculus GGEEERDRY KEYIQRRRER DEKTERRERR LDMACVVSGV A---FVAFW SFALF

Sesamum indicum NRVEEGQRRY KAYVEMKRER KERKLRTEGA LDMVCVAFGV S---IFVAFW ---CFLFSR

Erythranthe guttata NRVEEGQRRY CKYMEMKRER REKLRVESA LDMFVAFGI S---LVFGFC ---CFLLCR

Beta vulgaris GRVEEGRRRY LEYLERKRE REKVLRRRGR LDNMCVGIGV F---LVFGII YLLCFSTSR

Medicago truncatula G-----EGY REFVKKKKE ERKKRVERR MDIMCLFVGL V---SLTFVA FFAL

Cicer arietinum -----EGH REFVKKKKE ERKKRAERR LDMLCLCVGL V---SLTFVA FFAL

Cajanus cajan N-----DRF ADFVYRKMER KERKVRDERR LDLLCLCLGF A---ILSFAA LSTLFL

Nicotiana tabacum

AT2G36090 RREVESKRRH EEFMEKKREM KEKKMRVESV FDILTVAFGI L---GFVLLV VFCLWRVTSI

**Consensus** .....**gk.ry** .**e**.....**krer** .**erk**.**rre**.. **ld**.**c**....**g**. . .**f**.... ..**lf**.....

**Conserved regions**

Figure S2. (continued)

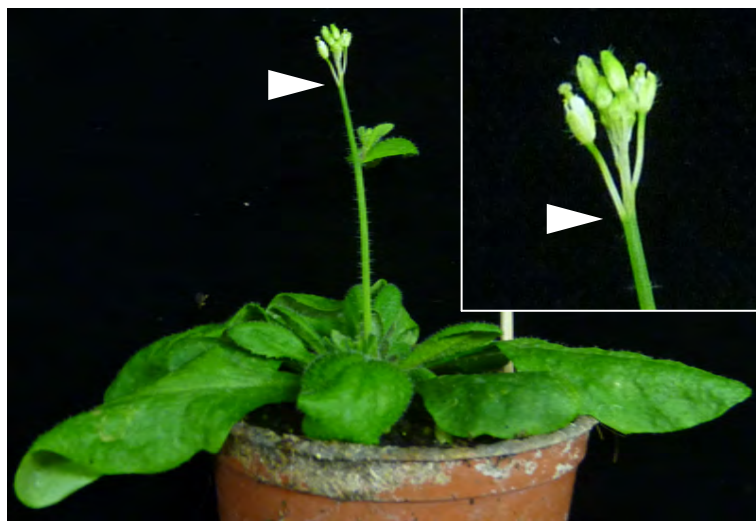

*Pro35S:CFB-GFP-52V*

**Figure S3.** Phenotype of plants overexpressing a *CFB-GFP* fusion gene. Photograph of a transgenic plant harboring the *Pro35S:GFP-CFB* gene (individual 52V, see Figure 3) four weeks after germination showing the typical *CFB* overexpression phenotype with white inflorescence stem tips. The arrowhead indicates the onset of the white stem tissue. The inset shows the inflorescence of the same plant at a higher magnification.

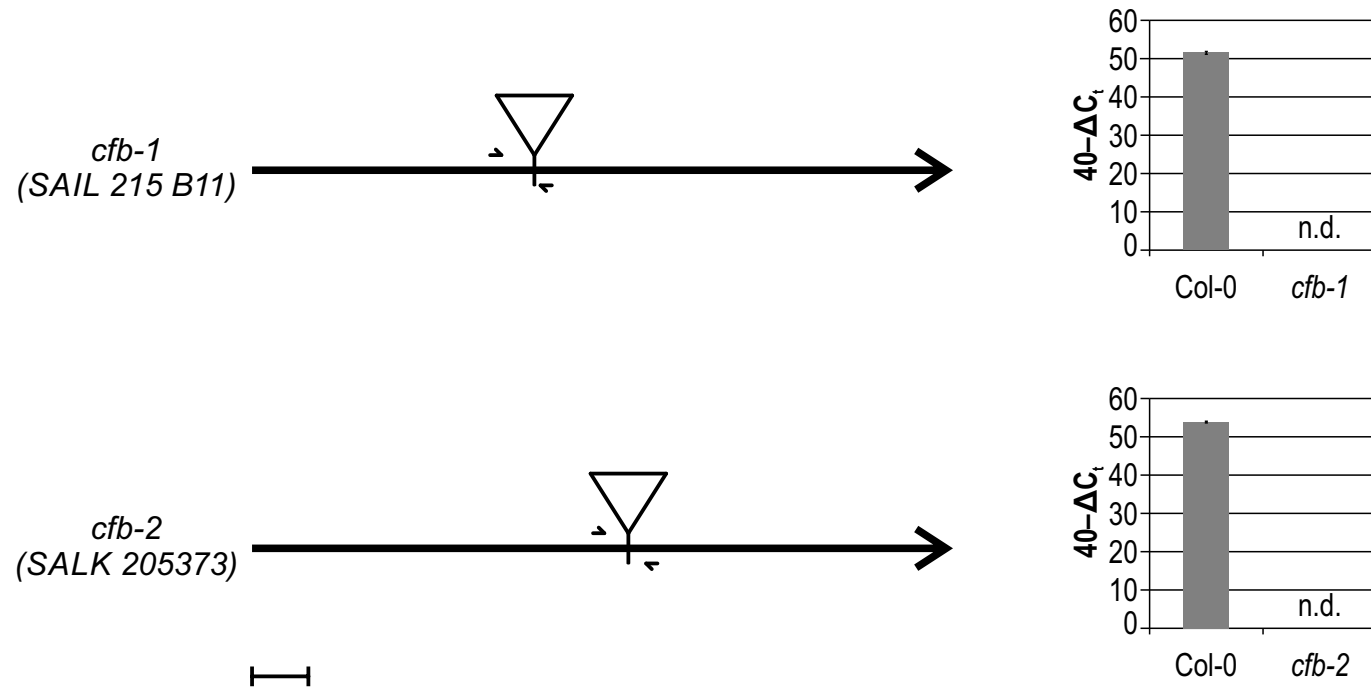

**Figure S4.** Analysis of the *CFB* transcript in *cfb-1* and *cfb-2* mutants. The position of the T-DNA insertions relative to the cDNA of *CFB* (represented by a bold arrow) is marked by triangles, the position of the primers used for quantitative real-time RT-PCR by half arrows. Transcript abundance was measured by 40 cycles of quantitative real-time RT-PCR in leaves of wild-type (*Col-0*), *cfb-1*, and *cfb-2* mutant plants. *AT3G25800* (*PP2AA2*) was used as a reference gene. Primer sequences are listed in Table S2. Error bars = SD ( $n = 3$ ). n.d.: not detected. Scale bar = 100 bp.

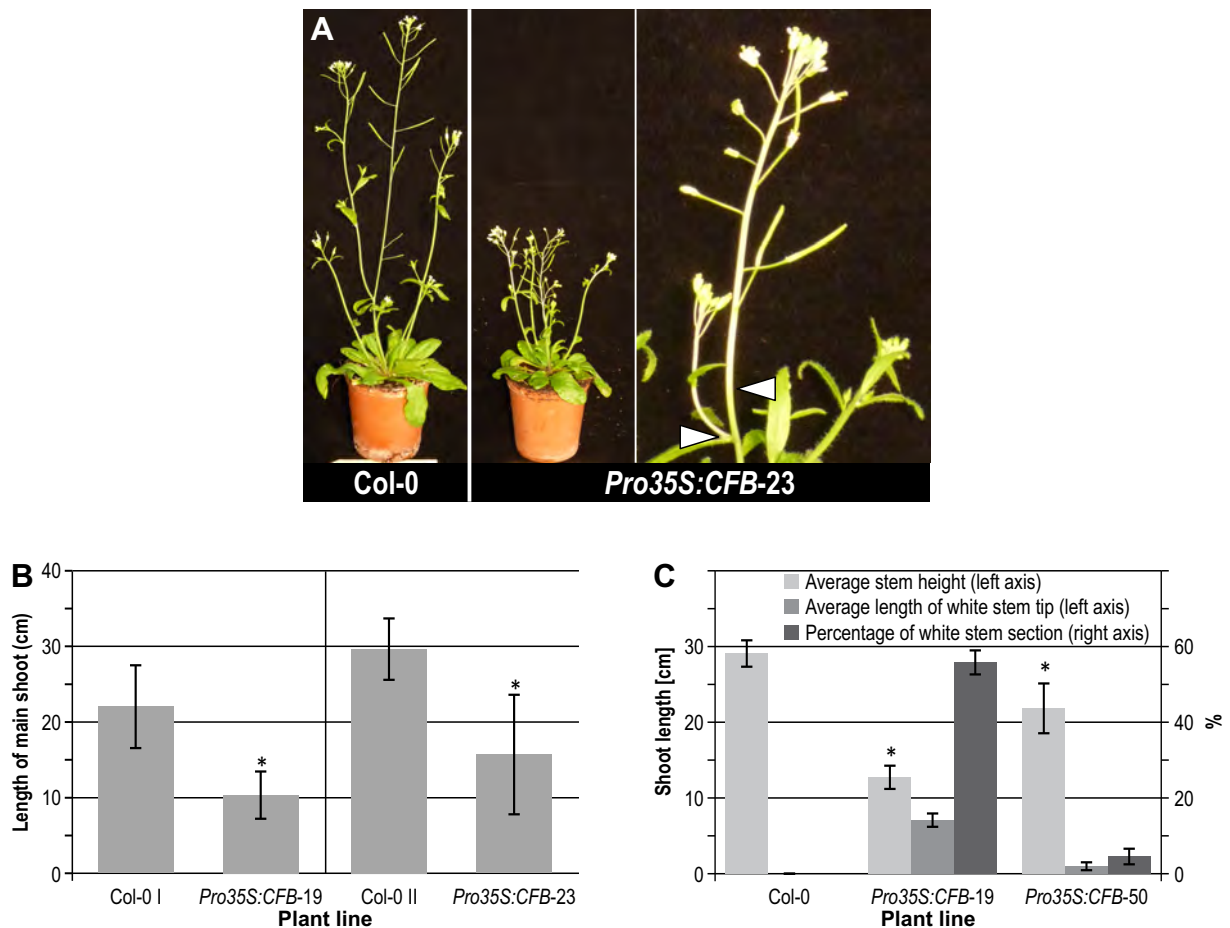

**Figure S5.** Comparison of independent *CFB* overexpressing lines to the reference line *Pro35S:CFB-19* and wild type. **A**, Comparison of line *Pro35S:CFB-23* to wild type at the flowering stage. The onset of albinotic tissue formation is indicated with arrowheads. **B**, Comparison of inflorescence stem length between the wild type (*Col-0*) and the *CFB* overexpressing lines 19 and 23, respectively. Stem lengths of plants grown on soil in the greenhouse were measured 30 (line 19) or 38 (line 23) days after sowing. **C**, Lengths of the main stems and percentage of the white upper portion of the stems of lines 19 and 50 in comparison to the wild type. Stem lengths of plants grown on soil in the greenhouse were measured 38 days after sowing. Error bars = SD ( $n \geq 8$ ). Asterisks indicate a  $p$  value  $< 0.01$  (Student's  $t$ -test; comparison transgenic lines vs. wild type).



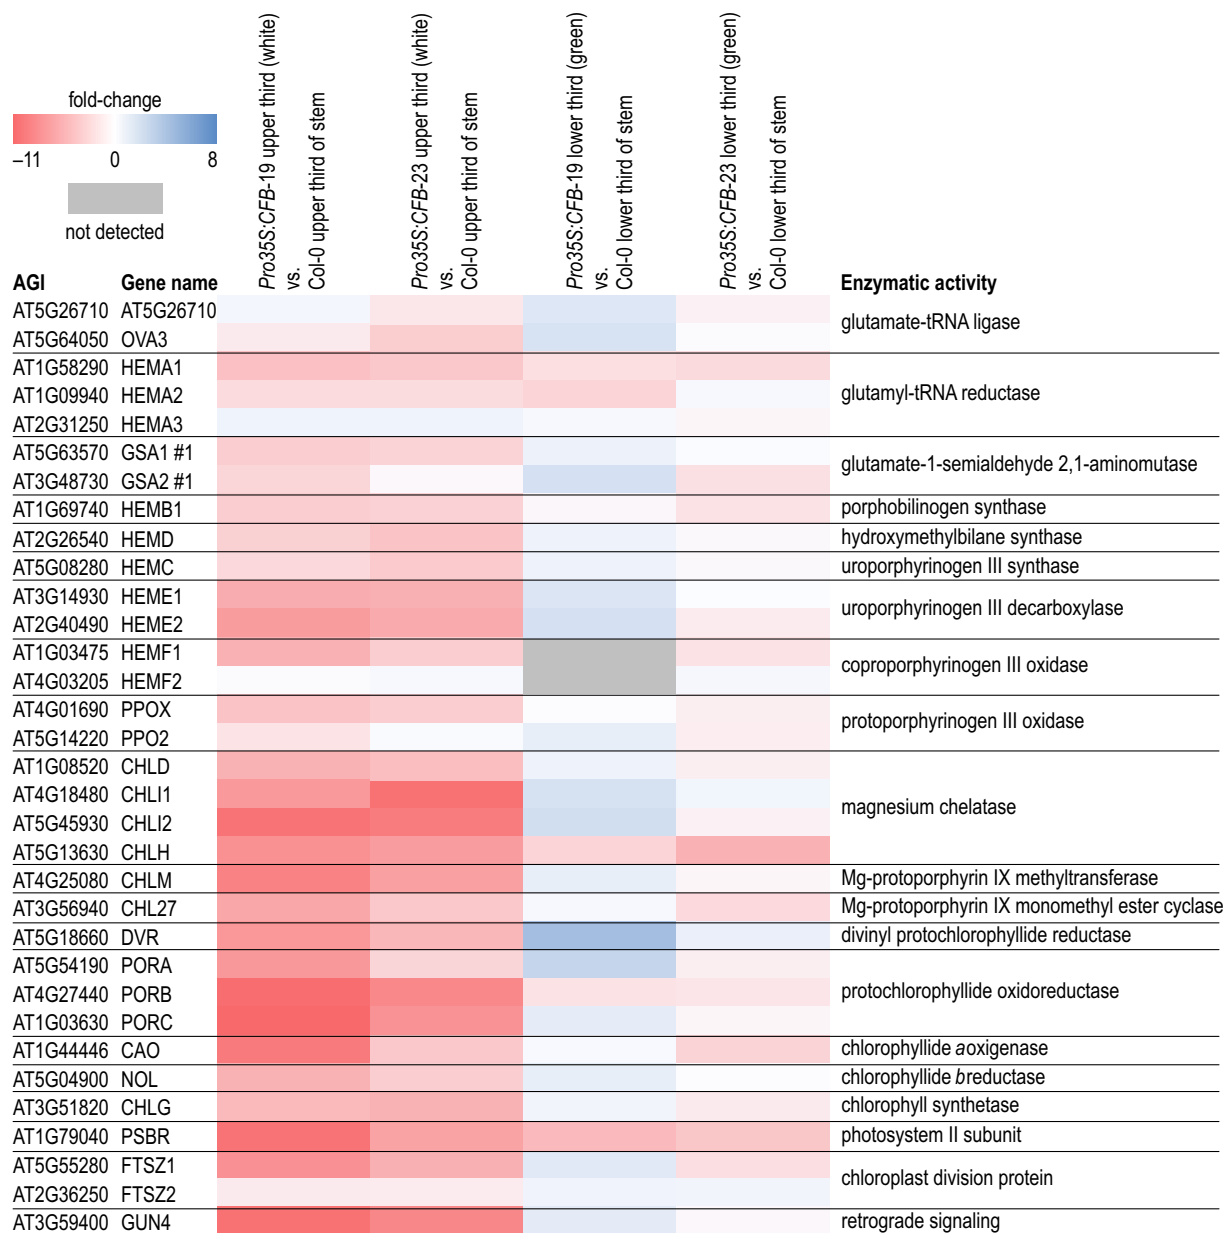

**Figure S6.** Expression of chlorophyll biosynthesis and other chloroplast-related genes in green and white stem sections of two *CFB* overexpressing lines, *ProCFB35S:CFB-19* and *Pro35S:CFB-23*. The upper and lower third of the stems of flowering plants were pooled from twenty plants of wild type and the two *CFB* overexpressing lines each. Transcript levels were quantified by qRT-PCR. The fold-changes between the samples indicated were calculated and shown as a heat map.

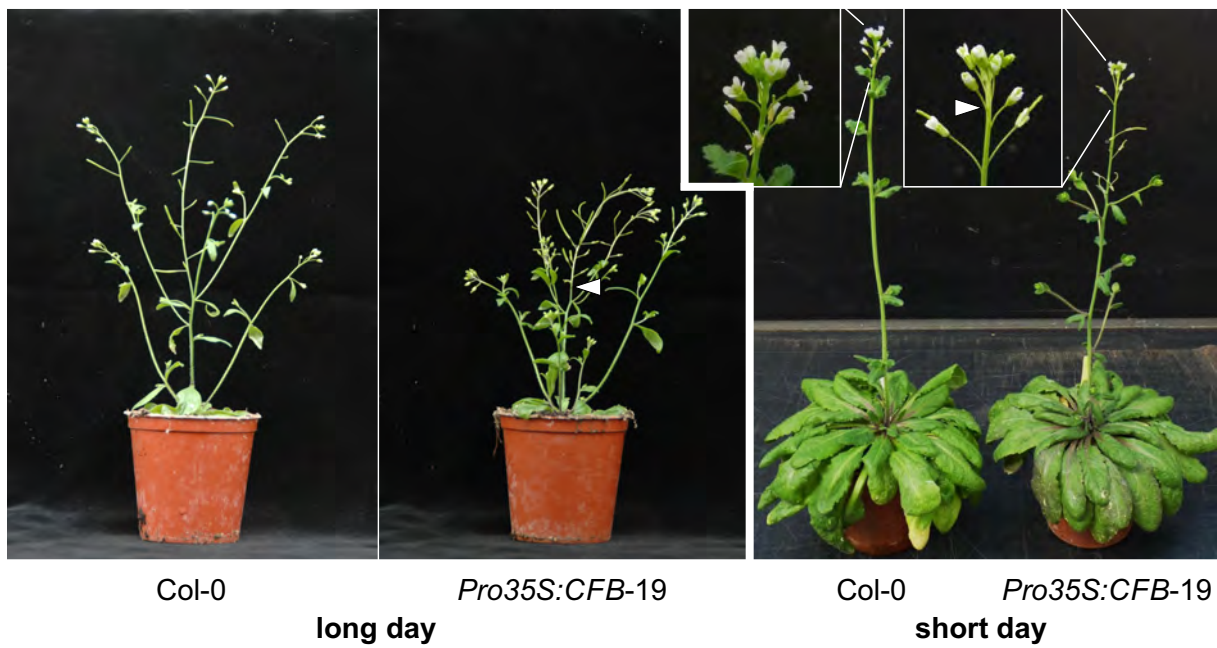

**Figure S7.** Formation of the albinotic stem tip of *CFB* overexpressing plants grown under long-day (16 h light/8 h dark) and short-day (8 h light/16 h dark) conditions. Arrowheads mark the onset of albinotic tissue formation.

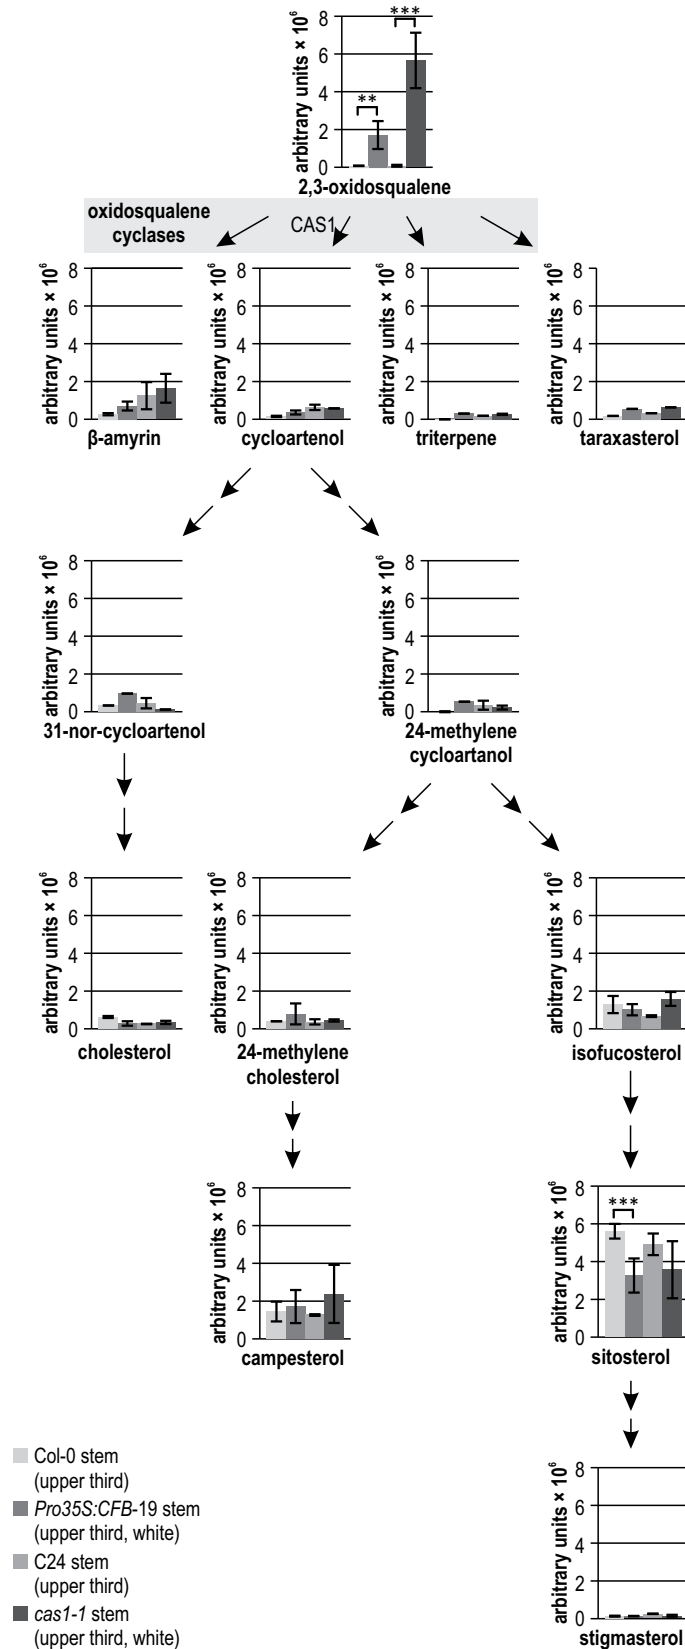

**Figure S8.** Relative concentrations of sterol metabolites in different genotypes and tissues. Sterol metabolites were measured in the upper thirds of the inflorescence stems of wild-type, *CFB* overexpressing (*Col-0* background), and *cas1-1* (*C24* background) mutant plants. In the two latter plants, the upper third of the stem contained only albinotic tissue. Units of the y axis are mass spectrometry peak heights normalized to the internal control  $\times 10^6$ . Significance codes: \*\*:  $p < 0.01$ ; \*\*\*:  $p < 0.001$ . Error bars = SD of two to four biological replicates
