# Supplementary material for: Analysis of CFB, a cytokinin-responsive gene of Arabidopsis thaliana encoding a novel F-box protein regulating sterol biosynthesis
Source: PubMed Central journal article supplement (PMC5853388; doi:10.1093/jxb/erx146), 2017-05-12
Supplement: erx146_suppl_supplementary_tables_s1_s2.pdf [file erx146_suppl_supplementary_tables_s1_s2.pdf]

**Supplemental Table 1.** Cloning procedures and PCR primers used in this study

| No | Plasmid                              | Purpose                                                                                                                                                                                 | Cloning procedure                                                          | forward primer                                            | reverse primer                                          | Backbone reference                |
|----|--------------------------------------|-----------------------------------------------------------------------------------------------------------------------------------------------------------------------------------------|----------------------------------------------------------------------------|-----------------------------------------------------------|---------------------------------------------------------|-----------------------------------|
| 1  | pDONR201-CFB-CDS                     | Intermediate for cloning of plasmid 2                                                                                                                                                   | PCR product from cDNA of untreated Col-0 leaves cloned by BP into pDONR201 | GGGGACAAGTTTGTACAAAAAGCAGGCTTATCT<br>TTTCTTGCATTTTCAACTCA | GGGGACCACTTTGTACAAGAAAGCTGGGTACCGATT<br>CAATTCCTCTTTGAA | Invitrogen, Carlsbad (CA), USA    |
| 2  | pB2GW7-CFB-CDS                       | Plant transformation vector for overexpressing CFB; used for transformation of <i>A. thaliana</i>                                                                                       | Insert of plasmid 1 cloned by LR into pB2GW7                               |                                                           |                                                         | Karimi et al., 2002               |
| 3  | pDONR221-CFB                         | Intermediate for cloning of plasmids 11, 19 and 25                                                                                                                                      | PCR product from cDNA of untreated Col-0 leaves cloned by BP into pDONR221 | AAAAAGCAGGCTATATGCTTTCGTCTTCGTCTTC <sup>1</sup>           | AGAAAGCTGGGTGCAATTCATTGAAGTTTTGAATC <sup>1</sup>        | Invitrogen, Carlsbad (CA), USA    |
| 4  | pDONR221-CFB ΔF-box                  | Intermediate for cloning of plasmids 12 and 20; contains the coding sequence of CFB lacking the N-terminal 74 amino acids including the F-box domain                                    | PCR product from cDNA of untreated Col-0 leaves cloned by BP into pDONR221 | AAAAAGCAGGCTATATGGATACACGTGTCCAAAGC <sup>1</sup>          | AGAAAGCTGGGTGCAATTCATTGAAGTTTTGAATC <sup>1</sup>        | Invitrogen, Carlsbad (CA), USA    |
| 5  | pDONR221-CFB ΔTM                     | Intermediate for cloning of plasmid 13; contains the coding sequence of CFB lacking the C-terminal 38 amino acids including the annotated transmembrane domain                          | PCR product from cDNA of untreated Col-0 leaves cloned by BP into pDONR221 | AAAAAGCAGGCTATATGCTTTCGTCTTCGTCTTC <sup>1</sup>           | AGAAAGCTGGGTCTACGTTTCTTTCCCTCGCC <sup>1</sup>           | Invitrogen, Carlsbad (CA), USA    |
| 6  | pDONR221-without stop CFB            | Intermediate for cloning of plasmids 17, 18, and 22; contains the coding sequence of CFB lacking stop codon                                                                             | PCR product from cDNA of untreated Col-0 leaves cloned by BP into pDONR221 | AAAAAGCAGGCTATATGCTTTCGTCTTCGTCTTC <sup>1</sup>           | AGAAAGCTGGGTATTTTATTAGTTTTTTCA <sup>1</sup>             | Invitrogen, Carlsbad (CA), USA    |
| 7  | pDONR221-without stop CFB ΔF-box     | Intermediate for cloning of plasmid 23; contains the coding sequence of CFB lacking the N-terminal 74 amino acids including the F-box domain and missing a stop codon                   | PCR product from cDNA of untreated Col-0 leaves cloned by BP into pDONR221 | AAAAAGCAGGCTATATGGATACACGTGTCCAAAGC <sup>1</sup>          | AGAAAGCTGGGTATTTTATTAGTTTTTTCA <sup>1</sup>             | Invitrogen, Carlsbad (CA), USA    |
| 8  | pDONR221-without stop CFB ΔTM        | Intermediate for cloning of plasmid 24; contains the coding sequence of CFB lacking the C-terminal 38 amino acids including the annotated transmembrane domain and missing a stop codon | PCR product from cDNA of untreated Col-0 leaves cloned by BP into pDONR221 | AAAAAGCAGGCTATATGCTTTCGTCTTCGTCTTC <sup>1</sup>           | AGAAAGCTGGGTACGTTTCTTTCCCTC <sup>1</sup>                | Invitrogen, Carlsbad (CA), USA    |
| 9  | pDONR221-pCFB                        | Intermediate for cloning of plasmid 25; contains the 2000 bp genomic region upstream of the CFB transcription start site                                                                | PCR product from genomic DNA of Col-0 leaves cloned by BP into pDONR221    | AAAAAGCAGGCTGTCCTGTCAATATAAGAG <sup>1</sup>               | AGAAAGCTGGGTGAGATAAAGATTGAGTTG <sup>1</sup>             | Invitrogen, Carlsbad (CA), USA    |
| 10 | pDONR221-ASK1                        | Intermediate for cloning of plasmids 14 and 15.                                                                                                                                         | PCR product from cDNA of untreated Col-0 leaves cloned by BP into pDONR221 | AAAAGCAGGCTATATGTCTGCGAAGAAGATTG <sup>1</sup>             | AGAAAGCTGGGTTCAATCAAAGCCCAATTGG <sup>1</sup>            | Invitrogen, Carlsbad (CA), USA    |
| 11 | pBTM-116cD9-GW-CFB                   |                                                                                                                                                                                         | Insert of plasmid 3 cloned by LR into pBTM-116cD9-GW                       |                                                           |                                                         | Stelzl et al., 2005               |
| 12 | pBTM-116cD9-GW-CFB ΔF-box            |                                                                                                                                                                                         | Insert of plasmid 4 cloned by LR into pBTM-116cD9-GW                       |                                                           |                                                         | Stelzl et al., 2005               |
| 13 | pBTM-116cD9-GW-CFB ΔTM               |                                                                                                                                                                                         | Insert of plasmid 5 cloned by LR into pBTM-116cD9-GW                       |                                                           |                                                         | Stelzl et al., 2005               |
| 14 | pACT2-ASK1                           |                                                                                                                                                                                         | Insert of plasmid 10 cloned by LR into pACT2                               |                                                           |                                                         | Clontech, Mountain View (CA), USA |
| 15 | CD3-1737 (NX32_GW)-ASK1 [NubG]       |                                                                                                                                                                                         | Insert of plasmid 10 cloned by LR into pNX32_GW                            |                                                           |                                                         | Lalonde et al., 2010              |
| 16 | CD3-1739 (NWT-X_GW) [Nub]            |                                                                                                                                                                                         |                                                                            |                                                           |                                                         | Lalonde et al., 2010              |
| 17 | CD3-1740 (MetYC_GW)-CFB [Cub]        |                                                                                                                                                                                         | Insert of plasmid 6 cloned by LR into ppMetYC_GW                           |                                                           |                                                         | Lalonde et al., 2010              |
| 18 | CD3-1740 (MetYC_GW)-CFB ΔF-box [Cub] |                                                                                                                                                                                         | Insert of plasmid 6 cloned by LR into pMetYC_GW                            |                                                           |                                                         | Lalonde et al., 2010              |

| No | Plasmid            | Purpose                                                                                                                                                                                                     | Cloning procedure                             | forward primer | reverse primer | Backbone reference  |
|----|--------------------|-------------------------------------------------------------------------------------------------------------------------------------------------------------------------------------------------------------|-----------------------------------------------|----------------|----------------|---------------------|
| 19 | pk7WGF2-CFB        | Used to express CFB fused C-terminally to GFP in transiently transformed <i>N. benthamiana</i> leaves                                                                                                       | Insert of plasmid 3 cloned by LR into pk7WGF2 |                |                | Karimi et al., 2002 |
| 20 | pk7WGF2-CFB ΔF-box | Used to express the CFB deletion construct lacking the N-terminal 74 amino acids including the F-box fused C-terminally to GFP in transiently transformed <i>N. benthamiana</i> leaves                      | Insert of plasmid 4 cloned by LR into pk7WGF2 |                |                | Karimi et al., 2002 |
| 21 | pk7WGF2-CFB ΔTM    | Used to express CFB deletion construct lacking the C-terminal 38 amino acids including the annotated transmembrane domain fused C-terminally to GFP in transiently transformed <i>N. benthamiana</i> leaves | Insert of plasmid 5 cloned by LR into pk7WGF2 |                |                | Karimi et al., 2002 |
| 22 | pk7FWG2-CFB        | Used to express CFB fused N-terminally to GFP in transiently transformed <i>N. benthamiana</i> leaves                                                                                                       | Insert of plasmid 6 cloned by LR into pk7FWG2 |                |                | Karimi et al., 2002 |
| 23 | pk7FWG2-CFB ΔF-box | Used to express the CFB deletion construct lacking the N-terminal 74 amino acids including the F-box fused N-terminally to GFP in transiently transformed <i>N. benthamiana</i> leaves                      | Insert of plasmid 7 cloned by LR into pk7FWG2 |                |                | Karimi et al., 2002 |
| 24 | pk7FWG2-CFB ΔTM    | Used to express CFB deletion construct lacking the C-terminal 38 amino acids including the annotated transmembrane domain fused N-terminally to GFP in transiently transformed <i>N. benthamiana</i> leaves | Insert of plasmid 8 cloned by LR into pk7FWG2 |                |                | Karimi et al., 2002 |
| 25 | pKGWFS7-pCFB       | Used to express a GUS-GFP fusion protein driven by the 2000 bp genomic region upstream of the transcription start site of CFB as a promoter                                                                 | Insert of plasmid 9 cloned by LR into pKGWFS7 |                |                | Karimi et al., 2002 |

1) PCR products obtained using these primers were completed in a second round of PCR using the primers GGGGACAAGTTTGTACAAAAAAGCAGGCT (forward) and GGGGACCACTTTGTACAAGAAAGATGGGT (reverse) before cloning them by BP into the respective pDONR vectors.

## References

- Karimi M, Inzé D, Depicker A** (2002) GATEWAY™ vectors for Agrobacterium-mediated plant transformation. *Trends in Plant Science* **7**: 193-195
- Lalonde S, Sero A, Pratelli R, Pilot G, Chen J, Sardi MI, Parsa SA, Kim D-Y, Acharya BR, Stein EV, Hu H-C, Villiers F, Takeda K, Yang Y, Han YS, Schwacke R, Chiang W, Kato N, Loqué D, Assmann SM, Kwak JM, Schroeder J, Rhee SY, Frommer WB** (2010) A membrane protein / signaling protein interaction network for Arabidopsis version AMPv2. *Frontiers in Physiology* **1**: 24
- Stelzl U, Worm U, Lalowski M, Haenig C, Brembeck FH, Goehler H, Stroedicke M, Zenkner M, Schoenherr A, Koeppen S, Timm J, Mintzlaff S, Abraham C, Bock N, Kietzmann S, Goedde A, Toksöz E, Droege A, Krobitsch S, Korn B, Birchmeier W, Lehrach H, Wanker EE** (2005) A Human Protein-Protein Interaction Network: A Resource for Annotating the Proteome. *Cell* **122**: 957-968

**Supplemental Table 2.** qRT-PCR and sequencing primers

| AGI                                              | Gene name | forward                           | reverse                  |
|--------------------------------------------------|-----------|-----------------------------------|--------------------------|
| AT5G26710                                        | AT5G26710 | CGTCTCTCTCTCAAACCCAC              | CAGCGGCGGAAGAATCAA       |
| AT5G64050                                        | OVA3      | AGAATCCGAGGGGAGTTTTG              | AGTTTGTCTTCCACAGCAGG     |
| AT1G58290                                        | HEMA1     | AGCTCGAGAAGTGCATGTCC              | CGCTCAGCGTTCTACTGTCA     |
| AT1G09940                                        | HEMA2     | CCTGTTGAGATGCGTGAGAA              | CGATGCTGAGATAGAGCCAAA    |
| AT2G31250                                        | HEMA3     | GCAGCATTGTGGTGATTGG               | GGTAACGAGAAAGAGCGGA      |
| AT5G63750                                        | GSA1 #1   | TCAATCATAAGCCCACCCAC              | GAGGAACACGAAAACCCCAA     |
| AT3G48730                                        | GSA2 #1   | GGGCTCACGAATAAGAGACA              | GCCAAAGCAGCAAGAACC       |
| AT1G69740                                        | HEMB1     | ATGGATGGGCGAGTAGGT                | CTCTCTGTAGTTTGCTGGGT     |
| AT2G26540                                        | HEMD      | GCACTATCTGCTCTGTCT                | TCAAGTCCTGGTTTCTCTGG     |
| AT5G08280                                        | HEMC      | CAAGGACGAAGAAGGCAAC               | GACCAGCACGAGATAGCA       |
| AT3G14930                                        | HEME1     | GAGCGAATGAAAGGAAGTGG              | AGGAAGCGGAGAGAATAGGT     |
| AT2G40490                                        | HEME2     | AAACTCACCCAAACCTACCTC             | TTCCTTGAAGTCTATGTCTCT    |
| AT1G03475                                        | HEMF1     | ATTCTCGTCTCTCTCCGCT               | CCACTCCTTCGGGTTGATG      |
| AT4G03205                                        | HEMF2     | GCAAGACGGAAATGTATGGG              | GCAAAAGGGTCTGAGGATG      |
| AT4G01690                                        | PPOX      | CCGAAAGAAGCAATCCGAAC              | GTGTTTGTAGACCCGCCA       |
| AT5G14220                                        | PPO2      | GCTGATGGAAGAGTAGGTGG              | GTTTCTCAGGAAGCCCAAGA     |
| AT1G08520                                        | CHLD      | TCGTGTGGCGAAGTGTTAG               | CGCTATTTTGTGGAGGAGGT     |
| AT4G18480                                        | CHLI1     | TTCTGGTTGGAATACGGTTGA             | CTTGTCTGCTCGGTTTTGT      |
| AT5G45930                                        | CHLI2     | TGTGATTGACCCGAAGATAGG             | TCAGTAGCACCCAAAGGAAGA    |
| AT5G13630                                        | CHLH      | CCTCAATGTGTTGCTTCCA               | GTTTCCCCCAGTTTTCTTCC     |
| AT4G25080                                        | CHLM      | CCGTTTGTCTCTTCTTGTG               | GAGTGTCTGCTACGGATCCTC    |
| AT3G56940                                        | CHL27     | CAGAATGTCAGCCTCTTCT               | AAGTCCGTCGTGTAGAACC      |
| AT5G18660                                        | DVR       | CGCCGCAGAGAGTATGTT                | TTCACCGAGTTCTTGACCC      |
| AT5G54190                                        | PORA      | TTGGTCTCCTCTGCTTTCTGTCC           | TGCTCCGAAAGTGAACACCCGAAC |
| AT4G27440                                        | PORB      | GTGCCTCCATTACCGACCAA              | TGCCGTCCACGGATTTTGT      |
| AT1G03630                                        | PORC      | GGCTCTCCAAGCTGCCTATT              | CTTGATGGTCAACAGGGTGGA    |
| AT1G44446                                        | CAO       | GATAAACCTCCTCTTCAACCA             | TCCCGTCTTCAACCCTAAA      |
| AT5G04900                                        | NOL       | TGGAATCAAAGCCTACACCA              | TGAACAACTGAGAAAGCAATACA  |
| AT3G51820                                        | CHLG      | GTCTCCACCATCCACTCTTC              | GCACGCACAACAAATCTCC      |
| AT1G79040                                        | PSBR      | AGAGGATTACCGTCGCTACAAGA           | ACACCGTATCCCTTGCCCTTCT   |
| AT5G55280                                        | FTSZ1     | CAATGCTCGGGTAGGTGTT               | TGCCAAACTGTACAGACCT      |
| AT2G36250                                        | FTSZ2     | CCTCAGCGGTCAAGTAAGCA              | TGACGCAGCATCTGCTTGT      |
| AT3G59400                                        | GUN4      | GCCAATCTACTTCGGACCA               | GTTGAAACGGCAGATACGGC     |
| AT3G44326                                        | CFB       | ACACAAAAGGAAACCAAGTAAGAGG         | GCCGTGTCTCCGATGTTTT      |
| AT5G53300                                        | UBC10     | CCATGGGCTAAATGAAA                 | TTCATTTGGTCTGTCTTCAG     |
| AT3G25800                                        | PP2AA2    | CCATTAGATCTGTCTCTCTGCT            | GACAAAACCCGTACCGAG       |
| primer pair spanning <i>cfb-1</i> insertion site |           | GTCCGTTGATACCTCGGAGT              | GCAAAGGAACCAACCAGAGA     |
| primer pair spanning <i>cfb-2</i> insertion site |           | AGGATGACACGTGAAAAAGTGA            | TGCACCGAGACAGGTTTACG     |
| LBa1 (sequencing of SALK T-DNA insertion lines)  |           | TGGTTCACGTAGTGGCCATCG             |                          |
| LB3 (sequencing of SAIL T-DNA insertion lines)   |           | TAGCATCTGAATTTATAACCAATCTCGATACAC |                          |
